# Supplementary material for: Using Facebook Advertising to Recruit Representative Samples: Feasibility Assessment of a Cross-Sectional Survey
Source: PubMed Central journal article supplement (PMC6718121; doi:10.2196/14021), 2019-08-19
Supplement: jmir_v21i8e14021_app1.pdf [file jmir_v21i8e14021_app1.pdf]

## Multimedia Appendix 1. Advertisement Campaign Details

This is a Multimedia Appendix to a full manuscript published in the J Med Internet Res. For full copyright and citation information see <http://dx.doi.org/10.2196/jmir.14021>

Table 1. Detailed Advertisement Targeting Criteria

| Targeting Criteria                    | Generic Ad                                 | Gender Ad                                  | Age Ad                                     | Education Ad                               | Rural Ad                                                                                                                                                                                                                                                                                                                                                                   |
|---------------------------------------|--------------------------------------------|--------------------------------------------|--------------------------------------------|--------------------------------------------|----------------------------------------------------------------------------------------------------------------------------------------------------------------------------------------------------------------------------------------------------------------------------------------------------------------------------------------------------------------------------|
| <b>Location</b>                       | Living in:<br>Newfoundland<br>and Labrador | Living in:<br>Newfoundland<br>and Labrador | Living in:<br>Newfoundland<br>and Labrador | Living in:<br>Newfoundland<br>and Labrador | Living in:<br>A0A, A0B, A0C,<br>A0E, A0G, A0H,<br>A0J, A0K, A0L,<br>A0M, A0N, A0P,<br>A0R <sup>a</sup>                                                                                                                                                                                                                                                                     |
| <b>Age</b>                            | 35-65+                                     | 35-65+                                     | 35-44                                      | 35-65+                                     | 35-65+                                                                                                                                                                                                                                                                                                                                                                     |
| <b>Gender</b>                         | All                                        | Men                                        | All                                        | All                                        | All                                                                                                                                                                                                                                                                                                                                                                        |
| <b>Languages</b>                      | English (US),<br>English (UK)              | English (US),<br>English (UK)              | English (US),<br>English (UK)              | English (US),<br>English (UK)              | English (US),<br>English (UK)                                                                                                                                                                                                                                                                                                                                              |
| <b>Detailed Targeting<sup>b</sup></b> | None                                       | None                                       | None                                       | None                                       | EXCLUDE<br>people who<br>match at least one<br>of the<br>following <sup>c,d</sup> : <ul style="list-style-type: none"> <li>• Associate degree</li> <li>• College grad</li> <li>• Doctorate degree</li> <li>• In college</li> <li>• In grad school</li> <li>• Master's degree</li> <li>• Professional degree</li> <li>• Some college</li> <li>• Some grad school</li> </ul> |

- a. These are the rural postal code forward sortation areas in Newfoundland & Labrador.
- b. Detailed Targeting is based on Demographics, Interests, Behaviours.
- c. Targeting by Demographics > Education > Education Level.
- d. Education Levels not excluded: High school grad, In high school, Some high school, and Unspecified.

Table 2. Images Used in Advertisements

| Advertisement | Images Used                                                                          | Notes                                                                                                                                                                                          |
|---------------|--------------------------------------------------------------------------------------|------------------------------------------------------------------------------------------------------------------------------------------------------------------------------------------------|
| Generic       |    | <p>Cost Per Link Click: \$0.44</p> <p>Link Clicks: 1,097</p>                                                                                                                                   |
| Rural Ad (1)  |   | <p>Cost Per Link Click: \$0.87</p> <p>Link Clicks: 311</p>                                                                                                                                     |
| Rural Ad (2)  |  | <p>Cost Per Link Click: \$0.97</p> <p>Link Clicks: 159</p>                                                                                                                                     |
| Rural Ad (3)  |  | <p>Cost Per Link Click: \$2.41</p> <p>Link Clicks: 2</p> <p>This advertisement was discontinued after reaching 342 people (total ad spend was \$4.82) due to the considerably higher cost.</p> |

| Advertisement | Images Used                                                                          | Notes                                                                                                                                                                                                  |
|---------------|--------------------------------------------------------------------------------------|--------------------------------------------------------------------------------------------------------------------------------------------------------------------------------------------------------|
| Gender Ad (1) |    | Cost Per Link Click: \$1.30<br>Link Clicks: 252                                                                                                                                                        |
| Gender Ad (2) |    | Cost Per Link Click: \$1.90<br>Link Clicks: 88<br>This image was used in effort to reach more men, but the higher cost per link click suggests men were less responsive to this ad than Gender Ad (1). |
| Age Ad        |  | Cost Per Link Click: \$0.73<br>Link Clicks: 114                                                                                                                                                        |
| Education Ad  |  | Cost Per Link Click: \$0.88<br>Link Clicks: 293                                                                                                                                                        |

*Note.* Various images were trialled in the Rural Ad and Gender Ad earlier in the recruitment period, but due to the better performance of the “are you at risk for cancer?” image, this was the imaged employed in ads later in the recruitment period. We recommend future researchers consider trialling various images in order to optimize their recruitment strategy.
